# Supplementary material for: Towards equitable scheduling of global health teleconferences: a spatial exploration of the world’s population and health by time zone
Source: HighWire-hosted journal article supplement (doi:10.1136/bmjopen-2021-056696), 2022-05-01
Supplement: bmjopen-2021-056696supp001_data_supplement.pdf [file bmjopen-2021-056696supp001_data_supplement.pdf]

**Supplementary Figure. Static image of interactive three-dimensional UTC split-plot of global population, countries, human development index, total and disease-specific disability adjusted life years per 100,000 by simplified Coordinated Universal Time offset, 2019-20**

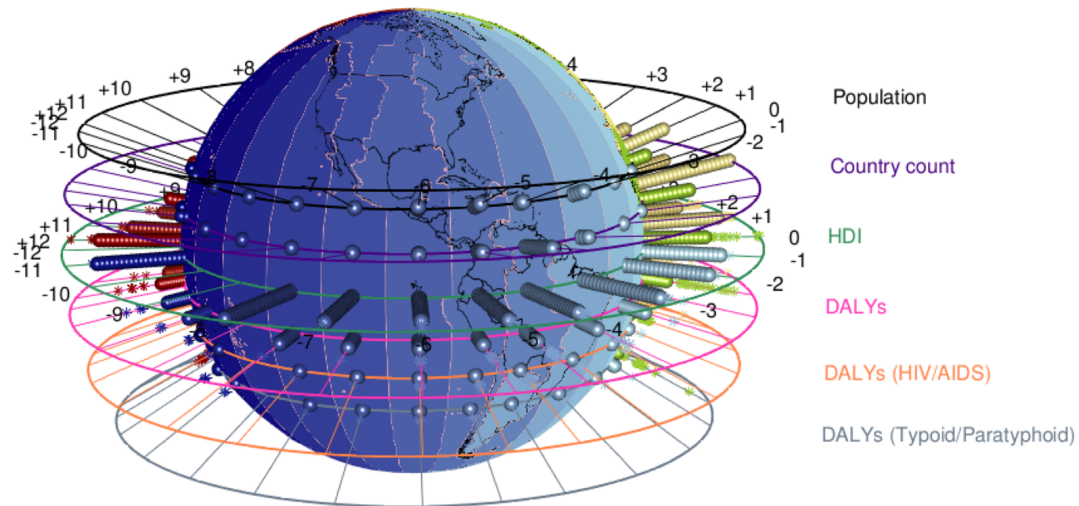

HDI: Human development index; DALYs: disability-adjusted life years; UTC: Coordinated Universal Time.

Interactive version available at:

[https://www.stats.otago.ac.nz/~tdavies/utcsplit\\_health.html](https://www.stats.otago.ac.nz/~tdavies/utcsplit_health.html)

(allow up to 30 seconds to load in browser)
